# Supplementary material for: High-Dose vs Standard-Dose Amoxicillin Plus Clavulanate for Adults With Acute Sinusitis: A Randomized Clinical Trial
Source: PubMed Central journal article supplement (PMC7988367; doi:10.1001/jamanetworkopen.2021.2713), 2021-03-23
Supplement: jamanetwopen-e212713-s001.pdf [file jamanetwopen-e212713-s001.pdf]

1 **Research Protocol**

2 Treatment of Acute Sinusitis with High-Dose vs. Standard-Dose  
3 Amoxicillin/Clavulanate: A Confirmation Study

4  
5 **Investigators**

6 Principal Investigator: Paul Sorum, MD, PhD

7 Co-Investigators: Danielle Wales, MD, MPH; Jennifer Gregory, MD; Bichtram Huynh,  
8 MD; Gina Garrison, PharmD

9  
10 **Background and Purpose**

11 Acute sinusitis is a common out-patient diagnosis and is commonly treated with  
12 antibiotics even though the current recommended regimen, amoxicillin/clavulanate  
13 875/125,<sup>1</sup> has been shown in clinical trials to provide only minimal benefit beyond  
14 placebo.<sup>2</sup> Evidence from studies in children of the penetration of amoxicillin into middle  
15 ear fluid<sup>3</sup> and of the treatment of acute sinusitis<sup>4</sup> suggested that a higher dose of  
16 amoxicillin would provide more benefit to adults without increasing side effects. We  
17 performed in 2014-17, therefore, a double-blind placebo-controlled trial of high-dose vs.  
18 standard-dose amoxicillin/clavulanate for clinically diagnosed acute bacterial sinusitis.<sup>5</sup>  
19 The study drug was the extended-release formulation of amoxicillin/clavulanate. Midway  
20 through the trial, the manufacturer stopped producing both the brand-name and the  
21 generic forms of the study drug. We were forced, therefore, to use instead for the high-  
22 dose arm a combination of standard immediate-release amoxicillin/clavulanate plus  
23 immediate-release amoxicillin. To our surprise, we found that the extended-release  
24 formulation provided no significant benefit, but the immediate-release formulation did;  
25 with 52% rating their symptoms as “a lot better” at the end of 3 days of treatment (the  
26 primary endpoint) vs. 34% (p = 0.04).

27 This finding needs, however, to be replicated because 1) it was, arguably, the  
28 result of an analysis not initially planned and of a sub-group; 2) the number of  
29 participants in the immediate-release part of the study was not large (less than half of the  
30 whole cohort), even if enough for statistical significance; 3) the secondary outcome, the  
31 change in the rating of 16 symptoms (the validated SNOT-16) from baseline to the end of  
32 3 and 10 days of treatment, did not show a significant improvement; 4) the biological  
33 explanation of the difference in outcomes (that the high concentration achieved, if only  
34 for a short time, by the immediate release might be needed for penetration of amoxicillin  
35 into sinus fluid) was only hypothetical; and 5) the percent of patients reporting “severe”  
36 diarrhea at day 3 was higher for the immediate-release high-dose group than for the  
37 others (which was also a surprise since other studies suggested that diarrhea is largely  
38 caused by the clavulanate, which was the same for all groups). The balance for patients  
39 between more rapid clinical improvement versus more common and severe adverse  
40 effects needs to be explored further. One problem is that patients with adverse effects  
41 from high-dose amoxicillin may not be able to appreciate that their sinus symptoms  
42 improved faster than if they had taken standard-dose.

43 The Infectious Disease Society of America (IDSA) recommends using high-dose  
44 amoxicillin/clavulanate when the prevalence in the community of penicillin-resistant  
45 pneumococci is >10%.<sup>1</sup> Few primary care clinicians will know this prevalence. By  
46 performing anterior nasal cultures on the first two-thirds of our participants in the initial

47 trial, we confirmed our expectation that very few of our patients are colonized with  
48 penicillin-resistant pneumococci. We will not need to repeat this part of the study.

49 If we confirm that supplementing standard, immediate-release amoxicillin-  
50 clavulanate 875/125 bid with standard, immediate-release amoxicillin 875 bid results in  
51 as substantial a benefit as in the initial study, we will be able to provide patients with a  
52 treatment that is clearly more efficacious than placebo and that is also quite inexpensive  
53 and easily available. If we find that the increase in adverse effects caused by the  
54 supplemental amoxicillin does not outweigh, in patients' judgments, the added benefits of  
55 treatment, we may change the way acute bacterial sinusitis is treated.

56

### 57 **Study Design and Methods**

58 Randomized, double-blind, comparative-effectiveness trial

59 Site: the Albany Medical College Internal Medicine and Pediatrics primary care practice  
60 in Latham, NY

61 Duration of study: 2 ½ years (November 2017-April 2020)

62

#### 63 *Investigators*

64 Faculty: Paul Sorum, MD, PhD; Danielle Wales, MD, MPH; Gina Garrison, PharmD

65 Medicine-Pediatrics residents: Jennifer Gregory, MD; Bichtram Huynh, MD

66 Albany Medical College student volunteers: Jennifer Cha; Chaitali Korgaonkar; Laura  
67 Stanfel

68

#### 69 *Participants*

70 Adults 18 years and older who are patients at the Albany Medical Center Internal

71 Medicine and Pediatrics Practice in Latham, NY.

#### 72 Inclusion criteria

- 73 1. Clinical diagnosis of acute bacterial sinusitis in accordance with the guidelines of  
74 the Infectious Disease Society of America, i.e., fitting into one of 3 categories:  
75 a. Persistent symptoms of rhinitis, purulent secretions, and/or pain in face or teeth  
76 and not improving (lasting for  $\geq 10$  days); or  
77 b. Severe symptoms or signs of fever  $\geq 102$  degrees F and nasal discharge or facial  
78 pain (lasting for  $\geq 3-4$  days); or  
79 c. Worsening symptoms or signs characterized by a new onset of fever, headache,  
80 or increase in nasal discharge following a typical viral URI that lasted 5-6 days  
81 and was initially improving ("double-sickening").  
82 2. Patients who participated in the initial study will be eligible. Having chronic or  
83 recurrent sinus infections was, and will again be, an exclusion criterion, but it  
84 would decrease external validity to exclude patients who occasionally get sinusitis  
85 and might, therefore, have participated in the past 3 years. We are able to obtain  
86 different looking antibiotic and placebo pills, so that we can include even patients  
87 who knew or who think they knew which formulation they took in the first study.  
88 We will, however, plan a secondary analysis of those who were and were not in  
89 the initial study.

#### 90 Exclusion criteria

- 91 1. Patients who were enrolled previously in the current study

- 92 2. Allergy or intolerance to any penicillin (oral penicillin, amoxicillin, or  
93 dicloxacillin or IV penicillin, ampicillin, oxacillin, nafcillin, carbenicillin,  
94 ticarcillin, or piperacillin) or to amoxicillin/clavulanate  
95 3. Serious hypersensitivity reaction (e.g., anaphylaxis or Stevens-Johnson syndrome)  
96 to any beta lactam  
97 4. Elevated risk of amoxicillin-resistant bacteria  
98 a. Amoxicillin, penicillin, or other beta-lactam within the past month (not, as  
99 in the IDSA guidelines [2012], any antibiotics)  
100 b. Known to have had MRSA  
101 5. Chronic or recurrent “sinus” problems. Defined as persistent symptoms of “sinus”  
102 congestion, not attributed to nasal allergies, for 8 weeks or more (Mayo Clinic,  
103 2014) or 2 or more episodes of antibiotic-treated “sinusitis” in past 3 months.  
104 These patients are at risk of anatomical or immunological abnormalities and of  
105 harboring antibiotic resistant organisms.  
106 6. Need to use high-dose amoxicillin/clavulanate or levofloxacin or to send to ED or  
107 to hospitalize because of  
108 a. Signs of severe infection  
109 b. Immunocompromise  
110 7. Cognitive impairment, so unable to give reliable symptom ratings (even if a  
111 health proxy can give consent)  
112 8. Pregnant women and nursing mothers. Pregnancy is Category B, so we do not  
113 need to perform a pregnancy test prior to enrolling pre-menopausal women; but  
114 known pregnancy will be an exclusion because amoxicillin/clavulanate has been  
115 demonstrated as safe in pregnant animals but not yet in pregnant women, and in  
116 practice (as in the previous trial), both clinicians and pregnant women hesitate to  
117 participate in experiments unless it is important to include pregnant women as a  
118 category. Nursing will be an exclusion because of lack of information even  
119 though it is not likely to cause a problem.  
120 9. Drug warnings  
121 a. Taking allopurinol (which increases substantially the risk of rash)  
122 b. Current mononucleosis (because of amoxicillin-induced rash)  
123 c. Chronic kidney disease stage 4 with estimated GFR <30  
124 d. Hepatic impairment (not including isolated transaminase elevated < 2  
125 times upper limit of normal)  
126 e. History of antibiotic-associated colitis (*C. diffiile*)

127 Time in study

128 10-11 days (or a few days longer if difficult to make telephone contact at day 10)

129 Drop-outs

130 Participants can exit the study at any time: a) by going to Urgent Care or the Emergency  
131 Department if very sick (calling our office beforehand if possible, in accordance with  
132 office policy); b) by indicating this at the day 3 telephone call; or c) by calling the office  
133 or (after hours) the physician on call at any time

134 If appropriate, the office or on-call physician can switch the antibiotic (in accordance  
135 with ISDA guidelines) to doxycycline or levofloxacin

136

137 *Interventions*

138 Randomization:  
139 Participants will be randomized 1:1 by the pharmacist (GG) and her pharmacy students,  
140 who will prepare the study medication in bottles labeled only by study # and who will  
141 keep a list of study # and dosage that will be revealed to the investigators only after the  
142 completion of the study.  
143 Treatment arms:  
144 1. Standard dose: amoxicillin/clavulanate 875/125 + placebo tablet (OTC lactase)  
145 bid x 7 days  
146 2. High dose: amoxicillin/clavulanate 875/125 + amoxicillin 875 bid x 7 days  
147 Measurements:  
148 1. Global rating of improvement: on the scale 1=a lot worse, 2= a little worse, 3=the  
149 same, 4=a little better, 5=a lot better, 6=no symptoms (at telephone calls at the  
150 end of days 3 and 10)  
151 2. SNOT-16: rating of current condition of 16 symptoms on a scale of 0 = no  
152 problem to 4 = severe problem (at enrollment and at telephone calls at days 3 and  
153 10)  
154 3. Additional question at bottom of baseline SNOT-16: do you often have trouble  
155 with a) constipation, b) diarrhea, c) (for women) vaginal yeast infections (yes or  
156 no)?  
157 4. Rating of adverse effects (diarrhea, abdominal pain, [for women] vaginal itching  
158 and discharge, and rash on a scale of 0=none to 3=severe (at days 3 and 10)  
159 5. Were you treated for vaginal yeast infection (if so, when and how, and did it help)  
160 and for diarrhea (if so, when and how, and did it help)? (at day 10)  
161 6. How many doses of antibiotic did you not take? If you stopped early, why? (Felt  
162 so much better, side effects, forgot, lost medication) (at day 10)  
163 7. How would you balance the good effects and the bad effects of the antibiotic on a  
164 scale of -3=bad effects MUCH greater than good effects; -2=bad effects  
165 SOMEWHAT greater than good effects; -1= bad effects A LITTLE greater than  
166 good effects: 0=bad effects and good effects about equal; +1=good effects A  
167 LITTLE greater than bad effects; +2=good effects SOMEWHAT greater than bad  
168 effects; +3=good effects MUCH greater than bad effects (at day 10)  
169 8. Would you take this antibiotic again (yes, no, uncertain). Any further explanation  
170 of response beyond the previous question? (at day 10)  
171 9. What dosage do you think you took? And why? (looked up or recognized pills,  
172 degree of beneficial effect on sinus symptoms, level of severity of side effects) (at  
173 day 10)  
174 10. Drop-outs will be asked how many doses they took and why they are dropping out  
175 of the study (fear of adverse effects, actual experience of side effects, quick  
176 improvement, no improvement)  
177 Endpoints  
178 1. Primary efficacy endpoint: percent giving a global rating of improvement of 5 or  
179 6 after 3 days of treatment  
180 2. Secondary efficacy endpoints:  
181 a. Percent giving a global rating improvement of 5 or 6 at day 10

- 182                   b. Change in SNOT-16 average score from baseline (at enrollment) to 3 and  
183                   10 days after enrollment (with minimal clinically important change = 0.5  
184                   units of the scale from 0 to 4))  
185                   c. Percent having change in mean SNOT-16 item score at day 3 and 10  $\geq$  .5  
186                   (minimal clinically significant difference)  
187           3. Adverse effect endpoints:  
188               a. Percent having each of adverse effects and having level 3 (severe) of each  
189               of side effects 3 and 10 days after enrollment  
190               b. Percent having side effects in a) of those declaring themselves prone or  
191               not to have 1) diarrhea and 2) vaginitis (predictive power)  
192           4. Overall judgments::  
193               a. Mean rating on balance of good and bad effects at day 10  
194               b. Distribution of ratings of balance (using different cutoffs)  
195               c. Distribution of judgments about whether they would take the antibiotic  
196               again  
197           5. Impact of using the web: if any significant number of participants use the web to  
198           enter their responses, we will compare the answers to the endpoints of web vs.  
199           non-web participants  
200           6. Impact of potentially confounding factors:  
201               a. Use of nasal steroids (which can improve symptoms)<sup>6</sup>  
202               b. Use of other antibiotics in the past month (altering nasal flora)  
203               c. Discovery of the identity of the pills (unblinding)  
204

#### 205 *Study Materials*

- 206           1. Posters in waiting and examining room  
207           2. Enrollment form (filled out by enrolling physician)  
208           3. Day 0 SNOT-16 questionnaire (given by nurses to all patients with respiratory  
209           symptoms and, if not filled out already, filled out by participants at enrollment)\  
210           4. Consent Form  
211           5. Day 3 and Day 10 telephone or web questions [except for the additional day 10  
212           questions asked over the telephone or on the website] (handed out to participants  
213           at enrollment)  
214           6. Directions for nasal saline and contact information (handed out at enrollment)  
215           7. Telephone scripts or web forms at end of days 3 and 10  
216           8. Drop-out form  
217

#### 218 *Study Flow*

- 219           1. Nurse gives the patient with respiratory symptoms a SNOT-16 form to fill out and  
220           mentions the study to the patient.  
221           2. Physician does the standard clinical assessment; decides if the patient is likely to  
222           have sinusitis (according to IDSA guidelines) and might benefit from antibiotics;  
223           determines if the patient meets inclusion criteria for the study and has no  
224           exclusion criterion (as shown on the Enrollment Form); and explains the study to  
225           the patient.

- 226  
227  
228  
229  
230  
231  
232  
233  
234  
235  
236  
237  
238  
239  
240  
241  
242  
243  
244  
245  
246  
247  
248  
249  
250  
251  
252  
253  
254  
255  
256  
257  
258  
259  
260  
261  
262  
263  
264  
265  
266  
267  
268  
269  
270  
271
3. If the patient will be treated with antibiotics for acute sinusitis but will not be a participant in the trial, the physician will fill out the Treated Outside of Study part of the Enrollment Form and leave it on the designated spot in the Pod.
  4. If the patient is willing, the physician gives the Consent Form to the patient, explains what involved, and allows the patient to read it, ask questions, and decide to enter the study or not.
  5. If the patient enrolls in the study, the physician, nurse, or pharmacy student
    - a. Puts a patient sticker on the next study # in the Participant List in the locked study room;
    - b. Obtains the bag of study medications with that study # (prepared in advance by the pharmacist [GG]) and, as required by NYS law, writes on the bottles the patient's name and address, the physician's name, and the date;
    - c. Fills out the Enrollment Form: writes the study # on it, on the SNOT-16 form, and on a study folder; puts the forms in the study folder and leaves it in the locked study room; and brings the bag of study medications back to the examining room.
  6. The physician then
    - a. Gives the participant the study medication, with directions how to take the pills; gives the participant the Day 3 and Day 10 telephone questions with the study # written on them (without the questions added to the Day 10 form) with a request to fill them out after 3 and 10 days just in case the study personnel do not succeed in making contact on time;
    - b. Gives the participant the option of filling out the forms online, using AMC's membership in Qualtrics (in which the participant is identified by study number only), and, if desired, has the participant write down his or her email address and tells the participant that we will send by email the directions for the secure website (but also will telephone him or her);
    - c. Asks the participant if he or she wants a text message reminder and, if so, has him or her to write down the telephone number for the text (if different from the main number);
    - d. Shows the participant the directions for symptomatic treatment.
  7. The residents are responsible for making the telephone calls themselves or assigning them to the medical student members of the team. The residents telephone or send AMC emails to the students to provide the names, telephone numbers and dates of required telephone calls.
  8. At the ends of day 3 and 10, the participant is called by a member of the study team and asked the questions on the day 3 and day 10 telephone forms. If the participant wants a text reminder and/or wants to fill out the form online, the study team member sends the text and/or email with the link. The study team member enters the data from the web-based form or from the telephone call into the restricted database on the AMC Med-Ped Y drive (with participants identified only by study number) and also fills out the forms to be placed with the other study materials.
  9. If the participant sends to us (by e-mail, fax, or mail) a completed day 3 or 10 questionnaire and also provides answers over the telephone and if the written and

- 272 verbal answers differ, we will use the written version (unless the participant  
273 directs us not to).
- 274 10. If the participant asks the study team member for a call from the office, that  
275 request is communicated to the on-call physician for the Medicine-Pediatrics  
276 practice.
- 277 11. If a participant indicates at the day 3 call or at another time that he or she is  
278 dropping out of the study, the clinician, medical student, or staff member asks  
279 why, fills out the Drop-out form in paper and on the shared electronic database on  
280 the Y drive, and (if needed) notifies one of the study team members.
- 281 12. After the study has been completed, the data analyzed, and a study report  
282 accepted for publication, we will mail to each participant a summary of the study  
283 results and an indication of the dosage she or he took. We will then destroy the  
284 patient registry with its identifying information.

## 286 *Data Analyses*

### 287 *Sample size:*

288 To have a power of 80% to find again an increase in the primary endpoint from 34% to  
289 52% with an alpha of 0.05 %, we would need 230 patients (115 in each group). To find  
290 an increase only to 50%, we would need 292 patients (146 in each group). Our aim is,  
291 therefore, to enroll at least 240 and ideally 300 patients. We enrolled 315 patients in the  
292 previous study during an equivalent time period.

### 293 *Outcomes:*

294 Using SPSS, we will calculate

- 295 1. Chi-square analyses of the differences between the two arms in percentages of  
296 global ratings, adverse effects, balance between good and bad effects, willingness  
297 to take the antibiotic again, use of nasal steroids, and correct guesses of the dose  
298 (with alpha set at 0.05).
- 299 2. T-test analyses of the differences between the two arms in the changes of average  
300 SNOT-16 item rating from baseline to the end of day 3 and to the end of day 10  
301 and in the mean rating of balance between good and bad effects at day 10 (alpha  
302 0.05)
- 303 3. Subgroup analyses for 1) and 2) of those who did vs. did not participate in the  
304 initial study.
- 305 4. Repeat analyses combining a) the participants in this study and b) the participants  
306 in Time Period 2 of the initial study.

## 308 **Human subjects**

### 309 *Risks*

- 310 1. Adverse physical effects  
311 In the initial study the primary adverse effects were diarrhea and (in women)  
312 vaginal discharge or itching. In the second time period, comparing the antibiotic  
313 formulations used in the current study, the increases in these adverse effects  
314 associated with a doubling of the amoxicillin were:
  - 315 a. Diarrhea
    - 316 i. At day 3; any diarrhea 47.37 % vs. 30.65% (p=0.06); severe  
317 diarrhea 15.79% vs. 4.84% (p=0.05)

- 318 ii. At day 10: any diarrhea 17.32% vs. 12.00% (p=0.45); severe  
319 diarrhea 3.85% vs. 0 (p=0.16)
- 320 b. Vaginal itching or discharge
- 321 i. At day 3: any symptoms 15.91% vs. 7.84% (p=0.22); severe  
322 symptoms 2.27% vs. 1.96% (p=0.92)
- 323 ii. At day 10: any symptoms 23.68% vs 17.50% (p=0.50); severe  
324 symptoms 0 vs. 2.56% (p=0.33)
- 325 2. Flaws in decision making
- 326 a. Under-treatment: the risk of enrolling in the study a very sick patient who  
327 should be either treated with levofloxacin or sent to the ED. To guard  
328 against this, the enrolling physician must attest that the patient is not too  
329 sick to receive out-patient amoxicillin/clavulanate.
- 330 b. Over-treatment: the risk of enrolling patients who ought not to receive  
331 antibiotics. To minimize this, the enrolling physician must indicate to  
332 which of the 3 IDSA categories of acute bacterial sinusitis the patient  
333 belongs.
- 334 c. Coercion: the risk that, because we are their primary care office, patients  
335 who prefer not to be in a study will allow themselves to be enrolled. In the  
336 previous study, however, we found many patients not afraid to say no.
- 337 3. Breach of confidentiality
- 338 This is very unlikely to be a problem (see below). Nonetheless, since the  
339 study database indicates the presence or absence of the comorbidities of  
340 smoking, asthma or COPD, diabetes, and heart disease, it is conceivable,  
341 though unlikely, that someone might use this information to target the  
342 participant for marketing or other purposes. If a data breach does take  
343 place, we will immediately notify the AMC risk management office.
- 344

#### 345 *Benefits*

- 346 1. Patients receiving the extra dose of amoxicillin may benefit from a more rapid  
347 rate of improvement.
- 348 2. Other patients are likely to benefit if clinicians know whether or not to treat acute  
349 sinusitis with high-dose amoxicillin/clavulanate.
- 350

#### 351 *Confidentiality*

- 352 1. The enrolling physician, office nurse, or pharmacy student will place the patient's  
353 label next to the study # in the study patient registry. The patient number will be  
354 written on a study folder as well as on the enrollment form, the Consent form, and  
355 the baseline SNOT-16 that will be placed in that study folder (along with the day  
356 3 and 10 telephone forms, as well as the Drop-out form if needed). The study  
357 patient registry and the files will be kept in a locked room.
- 358 2. Communication between team members of patient names and telephone numbers  
359 will be either verbally or via Albany Med email (hence secure).
- 360 3. The participants who chose to enter their answers to the day 3 and 10  
361 questionnaires electronically will receive an email from the study team member  
362 with directions on how to access the secure Qualtrix website with their study  
363 number and will enter their data on it, identified only by study #. The study team



- 364 member will be able to access this data and transfer it to the study-wide database  
365 on the Y drive.
- 366 4. The study-wide shared electronic database for the entry of day 3 and 10 responses  
367 will be kept in the sinusitis study folder on the AMC Med-Ped Y drive, with  
368 access limited to members of the study team only, and will identify participants  
369 by study # only i.e. will contain no personal identifying information.
  - 370 5. The material in the participant's study file will contain no information that is at all  
371 likely to be embarrassing or compromising to the patient.
  - 372 6. The study team members are clinicians (physicians, office nurses, the pharmacy  
373 professor (GG), and pharmacy students) who are part of the practice and already  
374 have routine access to the patients' full medical records. The students from the  
375 Albany College of Pharmacy and Health Sciences have full access to patient  
376 records during their blocks in the office and, under the supervision of the  
377 pharmacy professor, regularly review and counsel patients about their  
378 medications. The medical students will not have access to the patient registry or  
379 the study files, although they will of course know the names of the participants  
380 whom they contact.
  - 381 7. Study data will ultimately be entered into an Excel database. Individual  
382 participants will be identified by study #, not by name; data will include sex and  
383 age (but not date of birth). The database will be kept in the sinusitis study folder  
384 of the AMC Y drive, with access limited to study team members.
  - 385 8. When the trial is complete, the data analyzed, and the report accepted for  
386 publication, we plan to notify participants of the study results and of the dosage  
387 they received and then to destroy the patient registry. We will not destroy the files  
388 and database, identified only by study #, so that, if needed, we can do further  
389 analyses.

390

### 391 **Costs**

392 Funds will come from the AMC Med-Ped Research Fund

- 393 1. Medications (for 300 participants)
  - 394 a. Amoxicillin/clavulanate 875/125: 4200 pills = \$840
  - 395 b. Amoxicillin 875: 2100 pills = \$525
  - 396 c. Placebo (lactase): 2100 pills = \$300
  - 397 d. Medication bottles and caps: 600 = \$210
- 398 2. Duplication of forms = \$350
- 399 3. Letters to participants after publication of study results = \$300
- 400 4. Total: \$2,175

401

### 402 **References**

- 403 1. Chow AW, Benninger MS, Brook I, et al. IDSA clinical practice guideline for  
404 acute bacterial rhinosinusitis in children and adults. *Clin Infect Dis.*  
405 2012;54(8):e72-e112.
- 406 2. Lemiengre MB, van Driel ML, Merenstein D, Young J, De Sutter AIM.  
407 Antibiotics for clinically diagnosed acute rhinosinusitis in adults. *Cochrane*  
408 *Database Syst Rev.* 2012;10:CD006089.

- 409  
410  
411  
412  
413  
414  
415  
416  
417  
418  
419
3. Canafax DM, Yuan Z, Deka K, Russlie HQ, Giebink GS. Amoxicillin middle ear fluid penetration and pharmacokinetics in children with acute otitis media. *Pediatr Infect Dis J.* 1998;17(2):149-156.
  4. Wald ER, Nash D, Eickhoff J. Effectiveness of amoxicillin/clavulanate potassium in the treatment of acute bacterial sinusitis in children. *Pediatrics.* 2009;124(1):9-15.
  5. Matho A, Mulqueen M, Tanino M, et al. High-dose versus standard-dose amoxicillin/clavulanate for clinically-diagnosed acute bacterial sinusitis: a randomized clinical trial. 2017; unpublished manuscript.
  6. Zalmanovici Trestioreanu A, Yaphe J. Intranasal steroids for acute sinusitis. *Cochrane Database of Systematic Reviews* 2013, Issue 12, Art No CD005149.
