# Supplementary material for: High-Dose vs Standard-Dose Amoxicillin Plus Clavulanate for Adults With Acute Sinusitis: A Randomized Clinical Trial
Source: PubMed Central journal article supplement (PMC7988367; doi:10.1001/jamanetworkopen.2021.2713), 2021-03-23
Supplement: jamanetwopen-e212713-s002.pdf [file jamanetwopen-e212713-s002.pdf]

## Supplemental Online Content

Gregory J, Huynh B, Tayler B, et al. High-dose vs standard-dose amoxicillin plus clavulanate for adults with acute sinusitis: a randomized clinical trial. *JAMA Netw Open*. 2021;4(3):e212713. doi:10.1001/jamanetworkopen.2021.2713

**eTable.** Changes in Baseline Characteristics in Each Group by Days 3 and 10

This supplemental material has been provided by the authors to give readers additional information about their work.

**eTable. Changes in Baseline Characteristics in Each Group by Days 3 and 10**

| Baseline Characteristic | Time Period | Standard Dose |                         | High Dose    |                      | P-value |
|-------------------------|-------------|---------------|-------------------------|--------------|----------------------|---------|
|                         |             | No. in group  | Mean (95% CI)           | No. in group | Mean (95% CI)        |         |
| Age (years)             | Baseline    | 79            | 48.5 (44.8–52.1)        | 78           | 48.5 (45.0–52.1)     | .98     |
|                         | Day 3       | 71            | 49.3 (45.4–53.2)        | 65           | 49.1 (45.1–53.1)     | .94     |
|                         | Day 10      | 56            | 48.2 (43.7–52.6)        | 49           | 50.3 (45.6–55.0)     | .51     |
|                         |             |               | <i>Percent (95% CI)</i> |              |                      |         |
| Female                  | Baseline    | 79            | 76.0% (66.5–85.4)       | 78           | 73.1 (63.2–82.9)     | .68     |
|                         | Day 3       | 71            | 77.5% (67.8–87.2)       | 65           | 69.2 (58.0–80.5)     | .28     |
|                         | Day 10      | 56            | 80.4% (70.0–90.8)       | 49           | 71.4 (58.8–84.1)     | .28     |
|                         |             |               | <i>No. (%)</i>          |              | <i>No. (%)</i>       |         |
| Smoking                 | Baseline    | 79            | 7 (8.9%)                | 78           | 12 (15.4%)           | .23     |
|                         | Day 3       | 71            | 7 (9.9%)                | 65           | 11 (16.9%)           | .14     |
|                         | Day 10      | 56            | 4 (7.1%)                | 49           | 6 (12.2%)            | .14     |
| Asthma/COPD             | Baseline    | 79            | 7 (8.9%)                | 78           | 13 (16.7%)           | .16     |
|                         | Day 3       | 71            | 7 (9.9%)                | 65           | 12 (18.5%)           | .22     |
|                         | Day 10      | 56            | 4 (7.1%)                | 49           | 9 (18.4%)            | .14     |
| Allergic rhinitis       | Baseline    | 79            | 21 (26.6%)              | 78           | 10 (12.8%)           | .04     |
|                         | Day 3       | 71            | 20 (28.2%)              | 65           | 8 (12.3%)            | .03     |
|                         | Day 10      | 56            | 16 (28.6%)              | 49           | 5 (10.2%)            | .03     |
| Nasal steroid use       | Baseline    | 79            | 19 (24.1%)              | 78           | 18 (23.1%)           | 1.0     |
|                         | Day 3       | 71            | 18 (25.4%)              | 65           | 16 (24.6%)           | 1.0     |
|                         | Day 10      | 56            | 17 (30.4%)              | 49           | 11 (22.5%)           | .39     |
|                         |             |               | <i>Mean (95% CI)</i>    |              | <i>Mean (95% CI)</i> |         |
| Days of illness         | Baseline    | 65            | 17.1 (14.4–19.8)        | 70           | 13.9 (12.5–15.3)     | .03     |
|                         | Day 3       | 59            | 16.9 (13.9–19.8)        | 57           | 13.7 (12.1–15.2)     | .06     |
|                         | Day 10      | 46            | 15.5 (12.6–18.4)        | 42           | 13.8 (12.0–15.6)     | .33     |

|                     |                      |    |                  |    |                  |     |
|---------------------|----------------------|----|------------------|----|------------------|-----|
| SNOT-16 total score | Baseline             | 78 | 29.4 (27.6-31.2) | 77 | 29.4 (27.7-31.1) | .99 |
|                     | Day 3                | 71 | 29.6 (27.8-31.5) | 65 | 29.8 (28.1-31.6) | .87 |
|                     | Day 10               | 56 | 30.4 (28.5-32.4) | 49 | 30.5 (28.5-32.5) | .96 |
| <b>Time Period</b>  | <b>IDSA category</b> |    | <i>No. (%)</i>   |    | <i>No. (%)</i>   |     |
| Baseline            | Duration > 10 days   | 76 | 58 (76.3%)       | 77 | 54 (70.1%)       | .49 |
|                     | Severe symptoms      | 76 | 6 (7.9%)         | 77 | 5 (6.5%)         |     |
|                     | Double sickening     | 76 | 11 (16.2%)       | 77 | 18 (23.4 %)      |     |
| Day 3               | Duration > 10 days   | 68 | 53 (77.9%)       | 64 | 44 (68.8%)       | .48 |
|                     | Severe symptoms      | 68 | 4 (5.9%)         | 64 | 4 (6.3%)         |     |
|                     | Double sickening     | 68 | 11 (16.2%)       | 64 | 16 (25.0%)       |     |
| Day 10              | Duration > 10 days   | 53 | 41 (77.4%)       | 48 | 31 (64.6%)       | .31 |
|                     | Severe symptoms      | 53 | 4 (7.6%)         | 48 | 4 (8.3%)         |     |
|                     | Double sickening     | 53 | 8 (15.1%)        | 48 | 13 (27.1%)       |     |
