# Supplementary material for: High-Dose vs Standard-Dose Amoxicillin Plus Clavulanate for Adults With Acute Sinusitis: A Randomized Clinical Trial
Source: PubMed Central journal article supplement (PMC7988367; doi:10.1001/jamanetworkopen.2021.2713), 2021-03-23
Supplement: jamanetwopen-e212713-s003.pdf [file jamanetwopen-e212713-s003.pdf]

## Data Sharing Statement

Gregory. High-Dose vs Standard-Dose Amoxicillin Plus Clavulanate for Adults With Acute Sinusitis. *JAMA Netw Open*. Published March 23, 2021. doi:10.1001/jamanetworkopen.2021.2713

### Data

**Data available:** Yes

**Data types:** Deidentified participant data

**How to access data:** [sorump@amc.edu](mailto:sorump@amc.edu)

**When available:** With publication

### Supporting Documents

**Document types:** None

### Additional Information

**Who can access the data:** Researchers who request the data

**Types of analyses:** For any medically-indicated purpose

**Mechanisms of data availability:** After I approve the request
